# Supplementary material for: Targeted Metabolic Profiling of Urine Highlights a Potential Biomarker Panel for the Diagnosis of Alzheimer’s Disease and Mild Cognitive Impairment: A Pilot Study
Source: PubMed Central journal article supplement (PMC7569858; doi:10.3390/metabo10090357), 2020-08-31
Supplement: metabolites-10-00357-s001.pdf [file metabolites-10-00357-s001.pdf]

**Supplementary Table S2.** Panel of metabolites selected by the CSF and LASSO mathematical algorithms and their corresponding performance metrics when comparing MCI from AD sufferers.

| Metabolite Panel by CFS                                                                                                                                                     |            |                            | Metabolite Panel by LASSO                                         |            |                            |
|-----------------------------------------------------------------------------------------------------------------------------------------------------------------------------|------------|----------------------------|-------------------------------------------------------------------|------------|----------------------------|
| Glucose<br>2-Hydroxyisovalerate<br>3-Hydroxyisovalerate<br>Cytosine<br>Urocanate<br>2-ketoisovalerate<br>Glycolate<br>Guanidoacetate<br>Malonate<br>Hippurate<br>Tryptophan |            |                            | Ethanol<br>Hippuric acid<br>Cytosine<br>Glucose<br>Guanidoacetate |            |                            |
|                                                                                                                                                                             | <b>SVM</b> | <b>Logistic Regression</b> |                                                                   | <b>SVM</b> | <b>Logistic Regression</b> |
| <b>AUC</b>                                                                                                                                                                  | 95%        | 94%                        | <b>AUC</b>                                                        | 81%        | 74%                        |
| <b>Sensitivity</b>                                                                                                                                                          | 78%        | 80%                        | <b>Sensitivity</b>                                                | 75%        | 75%                        |
| <b>Specificity</b>                                                                                                                                                          | 80%        | 64%                        | <b>Specificity</b>                                                | 79%        | 80%                        |
| <b>Accuracy</b>                                                                                                                                                             | 77%        | 83%                        | <b>Accuracy</b>                                                   | 81%        | 65%                        |

**Supplementary Table S3.** Panel of metabolites selected by the CSF and LASSO mathematical algorithms and their corresponding performance metrics when comparing healthy controls from AD sufferers.

| Metabolite Panel by CSF                                                                                     |            |                            | Metabolite Panel by LASSO                                                                                                  |            |                            |
|-------------------------------------------------------------------------------------------------------------|------------|----------------------------|----------------------------------------------------------------------------------------------------------------------------|------------|----------------------------|
| 2-hydroxyisovalerate<br>Acetate<br>Ethanolamine<br>Pyridoxine<br>2-Hydroxybutyrate<br>Alpha-ketoisovalerate |            |                            | 2-hydroxybutyric acid<br>Dimethylamine<br>Proline<br>Glycolate<br>Isoleucine<br>Spermine<br>2-aminoadipate<br>Ethanolamine |            |                            |
|                                                                                                             | <b>SVM</b> | <b>Logistic Regression</b> |                                                                                                                            | <b>SVM</b> | <b>Logistic Regression</b> |
| <b>AUC</b>                                                                                                  | 94%        | 90%                        | <b>AUC</b>                                                                                                                 | 79%        | 82%                        |
| <b>Sensitivity</b>                                                                                          | 78%        | 88%                        | <b>Sensitivity</b>                                                                                                         | 78%        | 85%                        |
| <b>Specificity</b>                                                                                          | 78%        | 78%                        | <b>Specificity</b>                                                                                                         | 78%        | 86%                        |
| <b>Accuracy</b>                                                                                             | 80%        | 80%                        | <b>Accuracy</b>                                                                                                            | 88%        | 90%                        |

**Supplementary Table S4.** The clinical parameters as collected for each individual recruited to our study. AD-Alzheimer's disease, MCI-Mild cognitive impairment; MMSE-Mini-menta state examination; CLOX-clock drawing task.

| Study ID# | Group   | MMSE Scores | Trails A/B   | CLOX 1/2 |
|-----------|---------|-------------|--------------|----------|
| SI 008    | AD      | 29/30       | NA           | NA       |
| MS 010    | AD      | 0/30        | NA           | NA       |
| MH 012    | AD      | 17/30       | NA           | NA       |
| AS 013    | AD      | 29/30       | NA           | NA       |
| NS 015    | AD      | 20/30       | 116/364 sec  | 12/14    |
| CM 022    | AD      | 04/30.      | NA           | NA       |
| BE 025    | AD      | 29/30       | Trails B 190 | 10/12.   |
| FE 028    | AD      | 9/30.       | NA           | NA       |
| AD 032    | AD      | 23/30       | NA           | 9/11.    |
| MB 044    | AD      | 17/30       | 184/320      | 5/10.    |
| RL 043    | AD      | 29/30       | 74/198       | 6/11.    |
| RM 045    | AD      | 25/30       | 36/142       | 6/13.    |
| JH 046    | AD      | 28/30       | 52/140       | 6/11.    |
| LB 051    | AD      | 29/30       | 90/204       | 6/13.    |
| VB 057    | AD      | 27/30       | 194/25       | 10/9.    |
| GE 059    | AD      | 22/30       | 94/unable    | 9/11.    |
| RW 064    | AD      | 20/30       | 189/159      | 8/11.    |
| JW 065    | AD      | 12/30.      | Unable       | 4/8.     |
| AC 079    | AD      | 16/30       | NA           | NA       |
| CS 081    | AD      | 20/30       | 277/unable   | 4/10.    |
| JoJ 004   | MCI     | 30/30       | 60/150 sec   |          |
| DC 016    | MCI     | 30/30       | Trails B 118 | NA       |
| JD 020    | MCI     | 27/30       | 36/94        | 7/12.    |
| AK 021    | MCI     | 28/30       | NA           | NA       |
| GS 052    | MCI     | 29/30       | 90/204       | 6/13.    |
| SP 066    | MCI     | 29/30       | 54/108       | 14/13    |
| CC 067    | MCI     | 29/30       | 63/120       | 11/11.   |
| RF 068    | MCI     | 30/30       | NA           | NA       |
| RA 082    | MCI     | 29/30       | Trails B 203 | 9/13.    |
| AK 084    | MCI     | 30/30       | 85/145       | 12/13.   |
| NE 001    | Control | 29/30       | NA           | NA       |
| DB 002    | Control | 30/30       | NA           | NA       |
| GB 006    | Control | 28/30       | NA           | NA       |
| GA 009    | Control | 29/30       | NA           | NA       |
| HS 014    | Control | 30/30       | NA           | NA       |
| LH 017    | Control | 29/30       | NA           | NA       |
| RM 018    | Control | 29/30       | NA           | NA       |
| HM 019    | Control | 30/30       | NA           | NA       |
| EH 027    | Control | 30/30       | 66/94        | 15/14    |
| RB 034    | Control | 28/30       | NA           | NA       |
| NZ 042    | Control | 27/30       | NA           | NA       |
| EC 037    | Control | 30/30       | NA           | NA       |
| AW 041    | Control | 30/30       | NA           | NA       |
| PK 047    | Control | 30/30       | NA           | NA       |
| RC 048    | Control | 30/30       | NA           | NA       |
| EZ 055    | Control | 29/30       | NA           | NA       |

|    |     |         |       |               |            |
|----|-----|---------|-------|---------------|------------|
| NL | 061 | Control | 30/30 | 60/90         | 12/13.     |
| HM | 053 | Control | 30/30 | NA            | NA         |
| RM | 056 | Control | 28/30 | NA            | NA         |
| MH | 060 | Control | 29/30 | NA            | NA         |
| MB | 058 | Control | 29/30 | nA            | NA         |
| JG | 070 | Control | 30/30 | NA            | NA         |
| IT | 072 | Control | 28/30 | 78/124        | 12/13.     |
| LT | 076 | Control | 29/30 | 75/154        | 12/12.     |
| RT | 077 | Control | 30/30 | 59/147        | 11/11.     |
| SB | 078 | Control | 28/30 | NA            | NA         |
| FG | 085 | Control | 28/30 | Trails A--113 | Clox 1--15 |
| DH | 086 | Control | 30/30 | 118/unable    | 6/5.       |
| CW | 088 | Control | 26/30 | NA            | NA         |

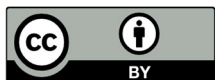

© 2020 by the author. Licensee MDPI, Basel, Switzerland. This article is an open access article distributed under the terms and conditions of the Creative Commons Attribution (CC BY) license (<http://creativecommons.org/licenses/by/4.0/>).
